# Supplementary material for: Magnetic two-dimensional molecularly imprinted materials for the recognition and separation of proteins
Source: Royal Society of Chemistry journal article supplement (doi:10.1039/c5cp04218f), 2015-09-08
Supplement: c5cp04218f1.pdf [file c5cp04218f1.pdf]

## **Supporting Information**

### **Magnetic Two-dimensional Molecularly Imprinted Materials for Recognition and Separation of Proteins**

**Fangfang Chen, Weifeng Zhao, Jingjing Zhang and Jie Kong\***

MOE Key Laboratory of Space Applied Physics and Chemistry, Shaanxi Key

Laboratory of Macromolecular Science and Technology, School of Science,

Northwestern Polytechnical University, Xi'an, 710072, P. R. China

\*E-mail: kongjie@nwpu.edu.cn, Tel.(fax): +86-29-88431621

**Table S1** Effect of BSA amount on the binding of BSA onto BSA 2D-MIPs<sup>a</sup>

| <b>Content of template BSA (mg)</b> | <b>Adsorption capacity (Q, mg/g)</b> |
|-------------------------------------|--------------------------------------|
| 5                                   | 43.14±1.82                           |
| 10                                  | 64.51±3.98                           |
| 15                                  | 75.86±3.19                           |
| 20                                  | 86.38±3.65                           |
| 30                                  | 87.04±2.76                           |

<sup>a</sup>Amount of BSA 2D-MIPs was 20 mg; volume:1 mL; the concentration of BSA: 1 mg/mL; incubation time: 1 h at room temperature.
